# Supplementary material
Source: HighWire-hosted journal article supplement (http://dmd.aspetjournals.org/highwire/filestream/80762/field_highwire_adjunct_files/0/1080_supp_data.pdf)
Supplement: 1080_supp_data.pdf [file 1080_supp_data.pdf]

**Table S1.** Primers used for qRT-PCR analysis.

|               |         |                                    |
|---------------|---------|------------------------------------|
| bcrp          | Forward | 5' -TTGGA CTCAAGCACAGCAAAT-3'      |
|               | Reverse | 5' -ATGGAATACCGAGGCTGGTGA-3'       |
| cyp3a2        | Forward | 5' -GATTCTAAGCATAAGCACCGAGT-3'     |
|               | Reverse | 5' -ACAGGGCTTTATGAGACACTTCGTCTT-3' |
| gapdh         | Forward | 5' -GCTCTCTGCTCCTCCCTGTTC-3'       |
|               | Reverse | 5' -GAGGCTGGCACTGCACAA-3'          |
| il-6          | Forward | 5' -GATGGATGCTTCCAAACTGGATAT-3'    |
|               | Reverse | 5' -TCCAGAAGACCAGAGCAGATTTT-3'     |
| mdr1a         | Forward | 5' -GCAGGTTGGCTGGACAGATT-3'        |
|               | Reverse | 5' -GGAGCGCAATTCCATGGATA-3'        |
| mdr1b         | Forward | 5' -AAACATGGCACGTAACCAAAGTT-3'     |
|               | Reverse | 5' -AAAATGTGGCCCTGTTTAATGATT-3'    |
| oatp2b1       | Forward | 5' -TGCCGCTCTTCTTCATTGG-3'         |
|               | Reverse | 5' -GGGCACCCAGGTCTTGTG-3'          |
| tnf- $\alpha$ | Forward | 5' -GGTCCAACAAGGAGGAGAAGT-3'       |
|               | Reverse | 5' -TGGGCCATGGA ACTGATGA-3'        |

**Table S2.** Maternal and Fetal Parameters

|                      | GD17              |                   | GD18              |                   |
|----------------------|-------------------|-------------------|-------------------|-------------------|
|                      | CT                | PE                | CT                | PE                |
| Maternal Weight (g)  | 291 $\pm$ 45      | 291 $\pm$ 33      | 327 $\pm$ 22      | 328 $\pm$ 20      |
| Number of Fetuses    | 11 $\pm$ 1        | 11 $\pm$ 1.5      | 11.5 $\pm$ 1.5    | 11.5 $\pm$ 1      |
| Fetal Weight (g)     | 0.443 $\pm$ 0.176 | 0.419 $\pm$ 0.163 | 1.036 $\pm$ 0.038 | 1.018 $\pm$ 0.049 |
| Placental Weight (g) | 0.305 $\pm$ 0.082 | 0.296 $\pm$ 0.075 | 0.429 $\pm$ 0.028 | 0.431 $\pm$ 0.027 |

**Table S3.** Excel spreadsheet of all differentially expressed proteins in the PE rat model, ordered by percent fold-change.

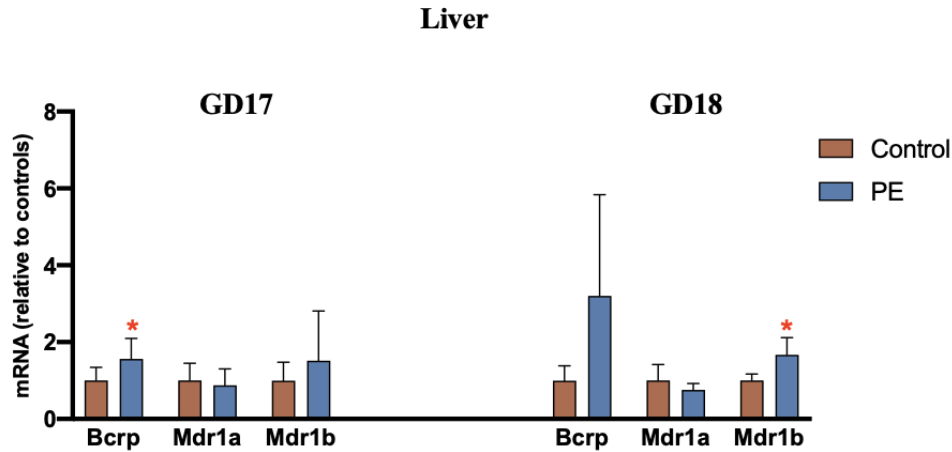

**Figure S1. Impact of PE on mRNA levels in maternal liver.** Relative mRNA levels was measured in maternal liver from PE or control dams on GD17 and GD18. Levels were measured by qRT-PCR, normalized to GAPDH, and are presented as mean  $\pm$  S.D. relative to saline controls (n=7-8 per group). Significance was determined using Student's unpaired t test (\*p < 0.05, \*\*p<0.01, \*\*\*p<0.001).

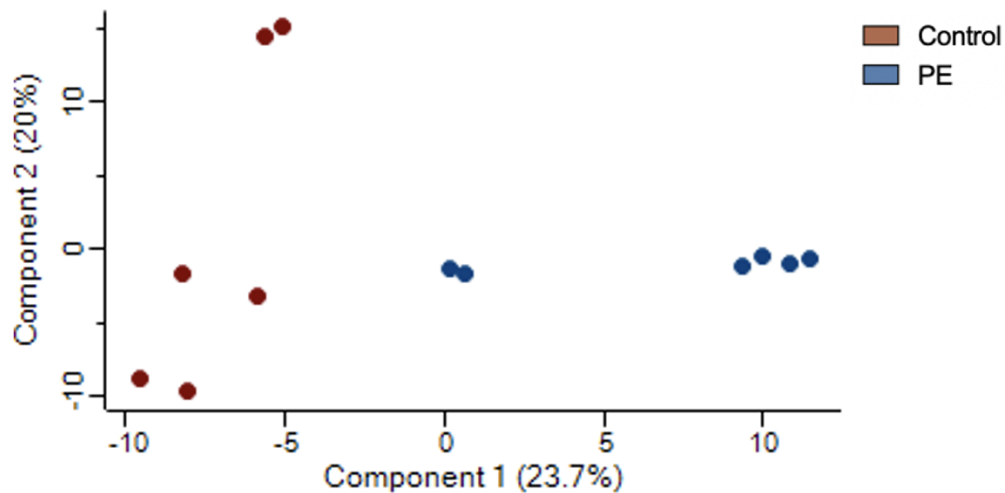

**Figure S2. Principal component analysis (PCA) of control and PE rats.** Differential protein expression was determined by LC-MS/MS in placental samples obtained from PE or control dams on GD18. Relative clustering of Control and PE groups indicate differences between their respective proteomes (n=3, run in technical duplicates). Plot generated using Perseus software.
